# Supplementary material
Source: Springer Nature journal article supplement (https://www.springermedizin.de/resource/supplementary/12875_2005_155_MOESM1_ESM.pdf/9436400)
Supplement: MOESM1 [file 9436400]

Smokers needed to give the following responses to 4 pre-consultation questionnaire items to be categorised as "hardcore smokers":

- Smoke "*every day*" or "*most days*" (i.e. regular smokers) when asked about amount smoked
- No attempts to quit in the past year lasting longer than 24 hours (i.e. no recent past quit attempts)
- Answered "*probably not*" or "*definitely not*" when asked if they intended to quit smoking in the next four weeks (i.e. no intention to quit)
- Answered "*I very much want to keep on smoking*", "*I would like to keep on smoking*" or "*I don't really want to stop smoking*" when asked if they wanted to stop smoking (i.e. no desire to quit).
